# Supplementary material for: Toward explainable deep learning in healthcare through transition matrix and user-friendly features
Source: Frontiers journal article supplement (doi:10.3389/frai.2024.1482141), 2024-11-25
Supplement: Table_1.docx [file Table_1.docx]

# Supplementary Figures


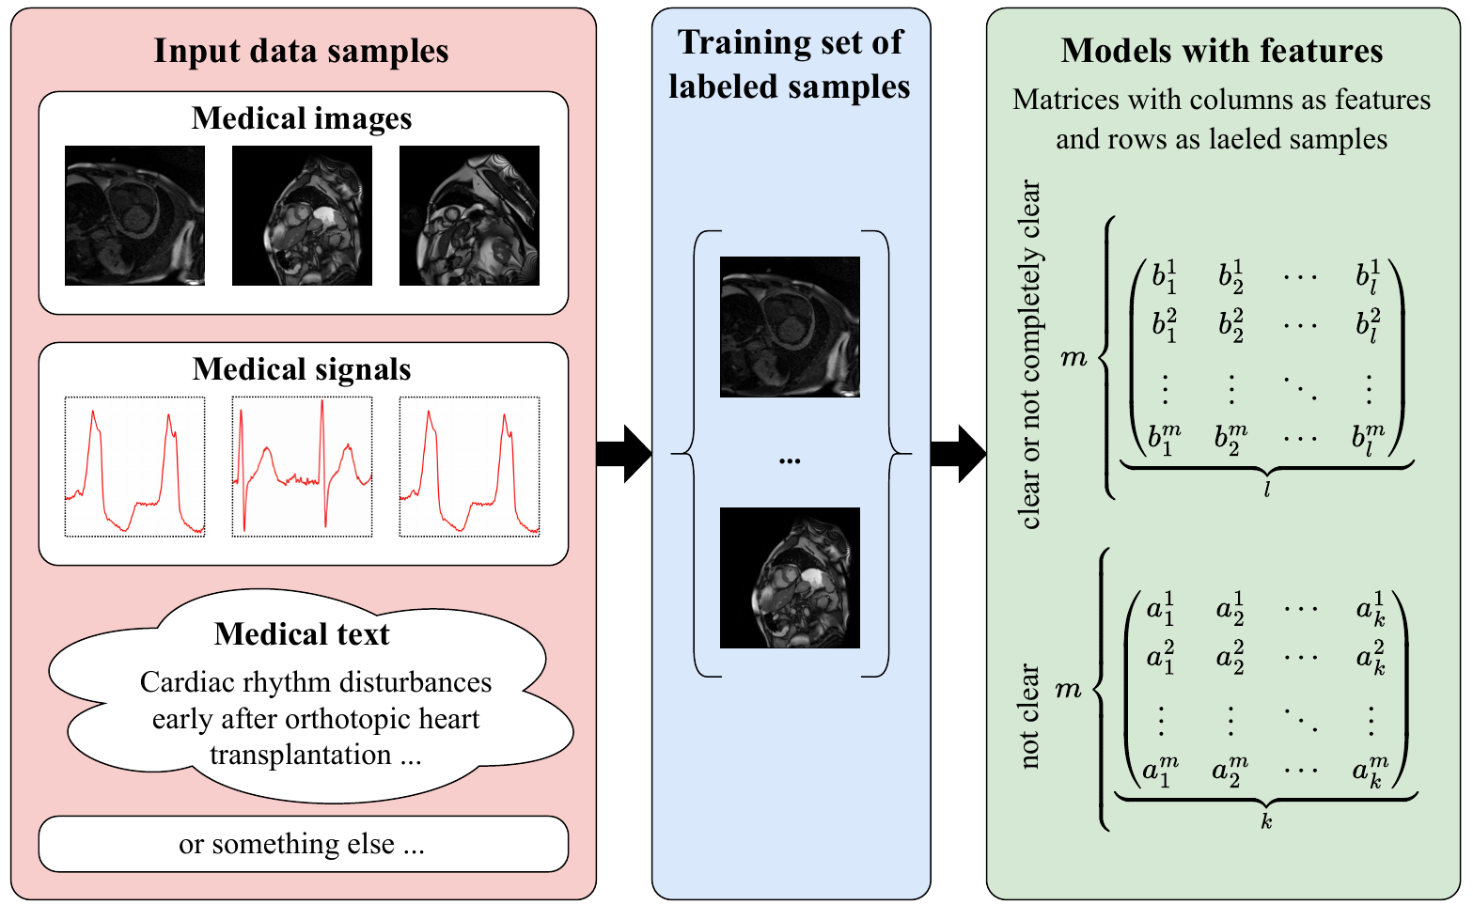


**Supplementary Figure 1.** The basic idea of our approach: The process of converting various medical data types–such as images, signals, and text–into a labeled training dataset, which is subsequently transformed into feature matrices where rows represent labeled samples and columns correspond to extracted features, organized by clarity for model development.


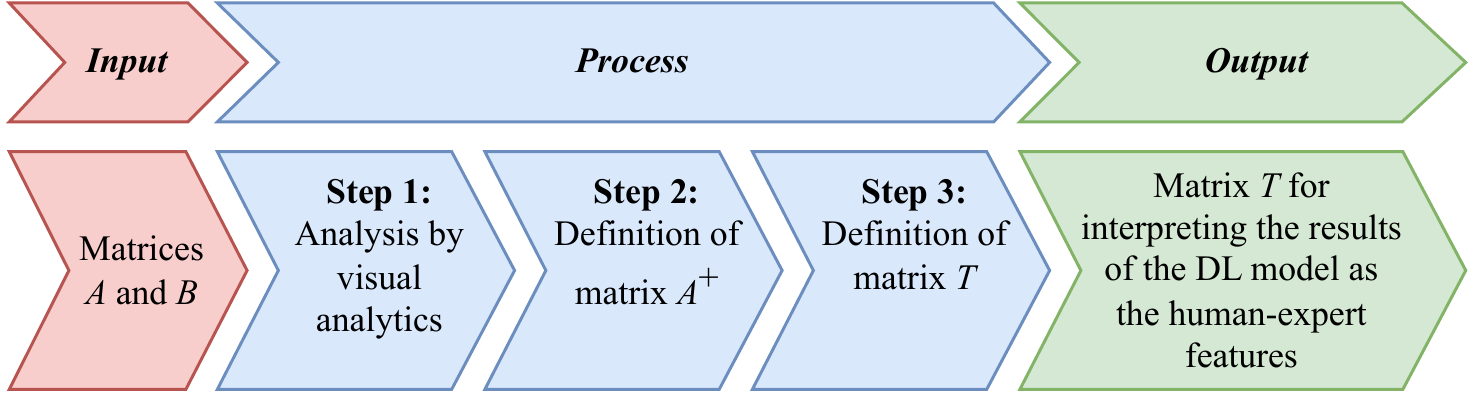


**Supplementary Figure 2.** Diagram of the basic approach to derive the transition matrix *T* from input matrices *A* and *B*, involving three main steps: visual analytics of the matrices, defining matrix *A*+, and establishing matrix *T*, which serves to interpret DL model outputs in terms of human-expert features.


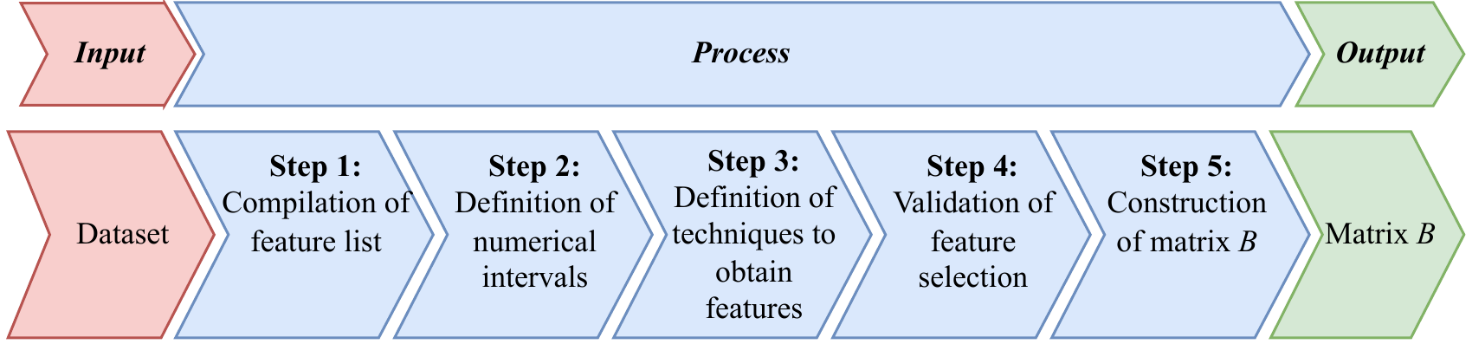


**Supplementary Figure 3.** Diagram that outlines the proposed sequential approach to constructing matrix *B* from an initial dataset, through steps including compiling a feature list, defining numerical intervals, selecting techniques to extract features, validating feature selection, and ultimately constructing matrix *B* based on the defined transition matrix from the deep learning model to the feature model.

| 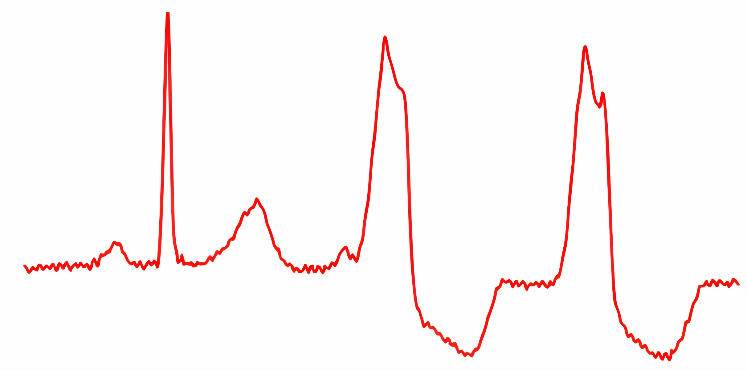 | 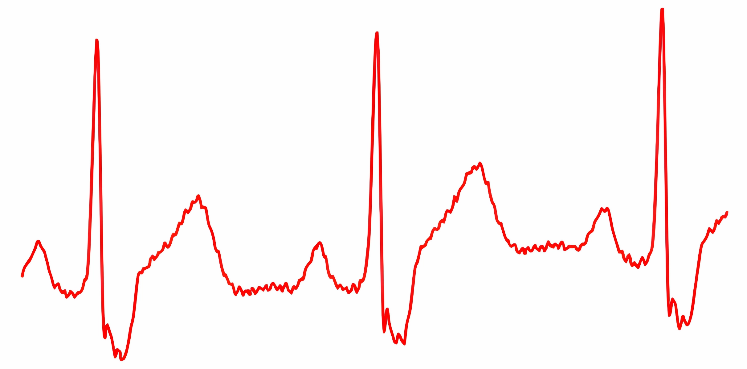 |
| --- | --- |
| (**a**) | (**b**) |

**Supplementary Figure 4.** This figure presents an ECG signal fragment displaying a triad of cardiac cycles, where (**a**) illustrates a heterogeneous appearance of the R peak, while (**b**) shows a homogeneous expression of the R peak across cycles.


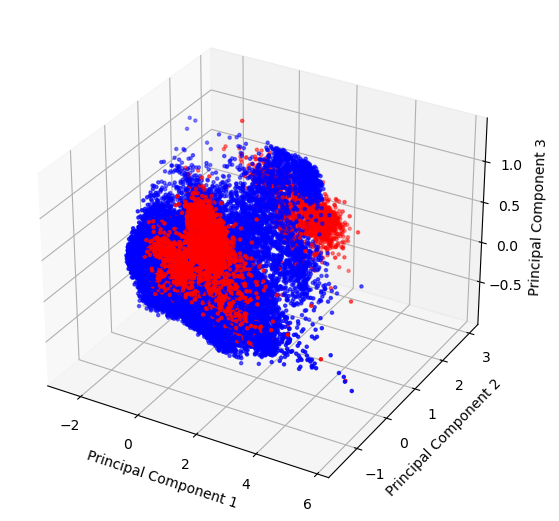


**Supplementary Figure 5.** The results of applying PCA to classify data based on the "Absent P peak" feature, showing data points distributed across three principal components for visualization of feature separation.

| 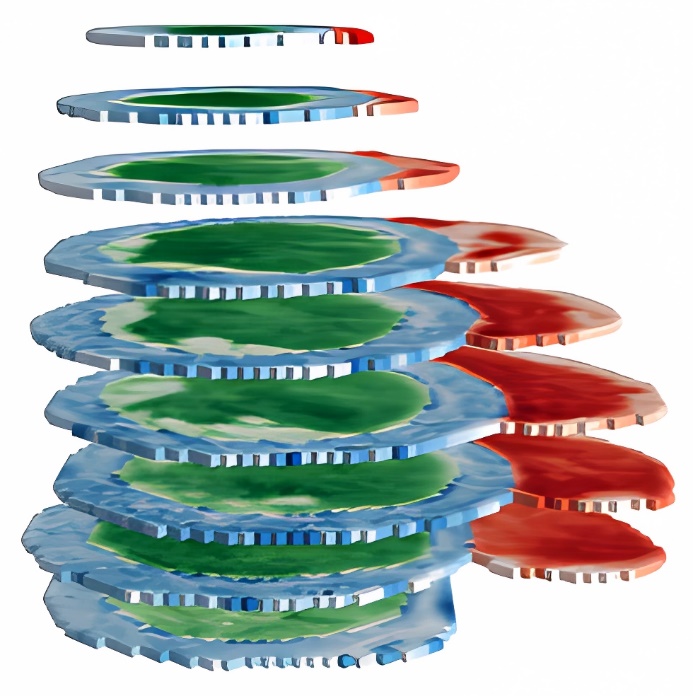 | 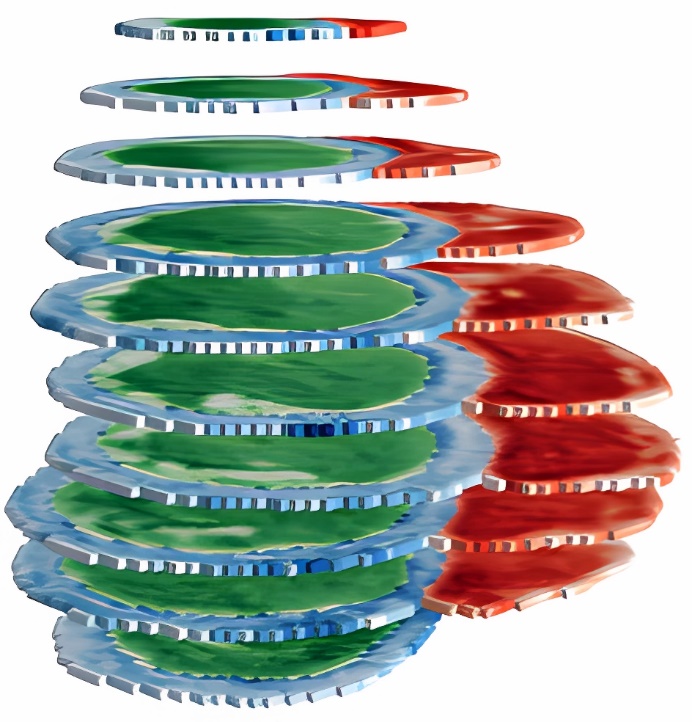 |
| --- | --- |
| (**a**) | (**b**) |

**Supplementary Figure 6.** A 3D visualization of segmented MRI data prepared for classification, with images from the ES phase in (**a**) and the ED phase in (**b**), while preserving MRI signal intensity values across layers for enhanced phase differentiation.
